# Supplementary material for: 2-Phenylethylamine (PEA) Ameliorates Corticosterone-Induced Depression-Like Phenotype via the BDNF/TrkB/CREB Signaling Pathway
Source: MDPI journal article supplement (doi:10.3390/ijms21239103), 2020-11-30

## Supplementary Information

### **Title: 2-Phenylethylamine (PEA) ameliorates corticosterone-induced depression-like phenotype via the BDNF/TrkB/CREB signaling pathway**

Young-Ju Lee<sup>1,3, #</sup>, Hye Ryeong Kim<sup>1,4, #</sup>, Chang Youn Lee<sup>1, #</sup>, Sung-Ae Hyun<sup>1</sup>, Moon Yi Ko<sup>1</sup>,  
Byoung-Seok Lee<sup>2</sup>, Dae Youn Hwang<sup>3</sup> and Minhan Ka<sup>1,\*</sup>

#### **Supplementary figure legends**

**Supplementary Figure 1. Effect of CORT and PEA on cultured hippocampal neuron viability (A, B)** The survival ratios of cultured hippocampal neurons after CORT (A) and PEA (B) treatment for 24 h. Statistical significance was determined by two-way ANOVA with Bonferroni correction test. Data are shown as relative changes versus controls. \* $p < 0.05$ , \*\* $p < 0.01$ , \*\*\* $p < 0.001$ .

#### **Supplementary Figure 1.**

**A**

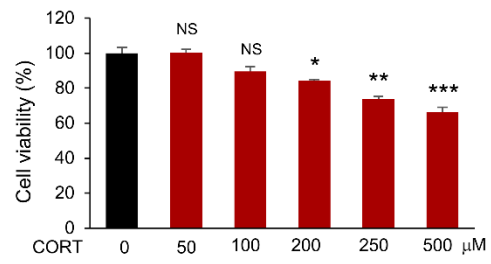

**B**

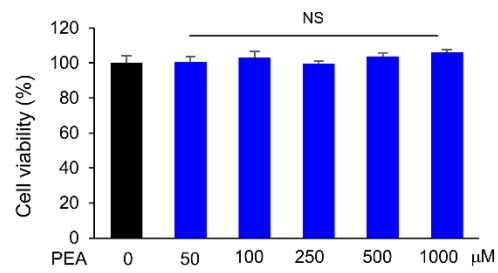

Supplement: s1 [file s1]
